# Supplementary material for: Identification of Metabolomic Biomarkers of Long-Term Stress Using NMR Spectroscopy in a Diving Duck
Source: MDPI journal article supplement (doi:10.3390/metabo12040353), 2022-04-15
Supplement: s1 [file s1]

## Supplementary Materials

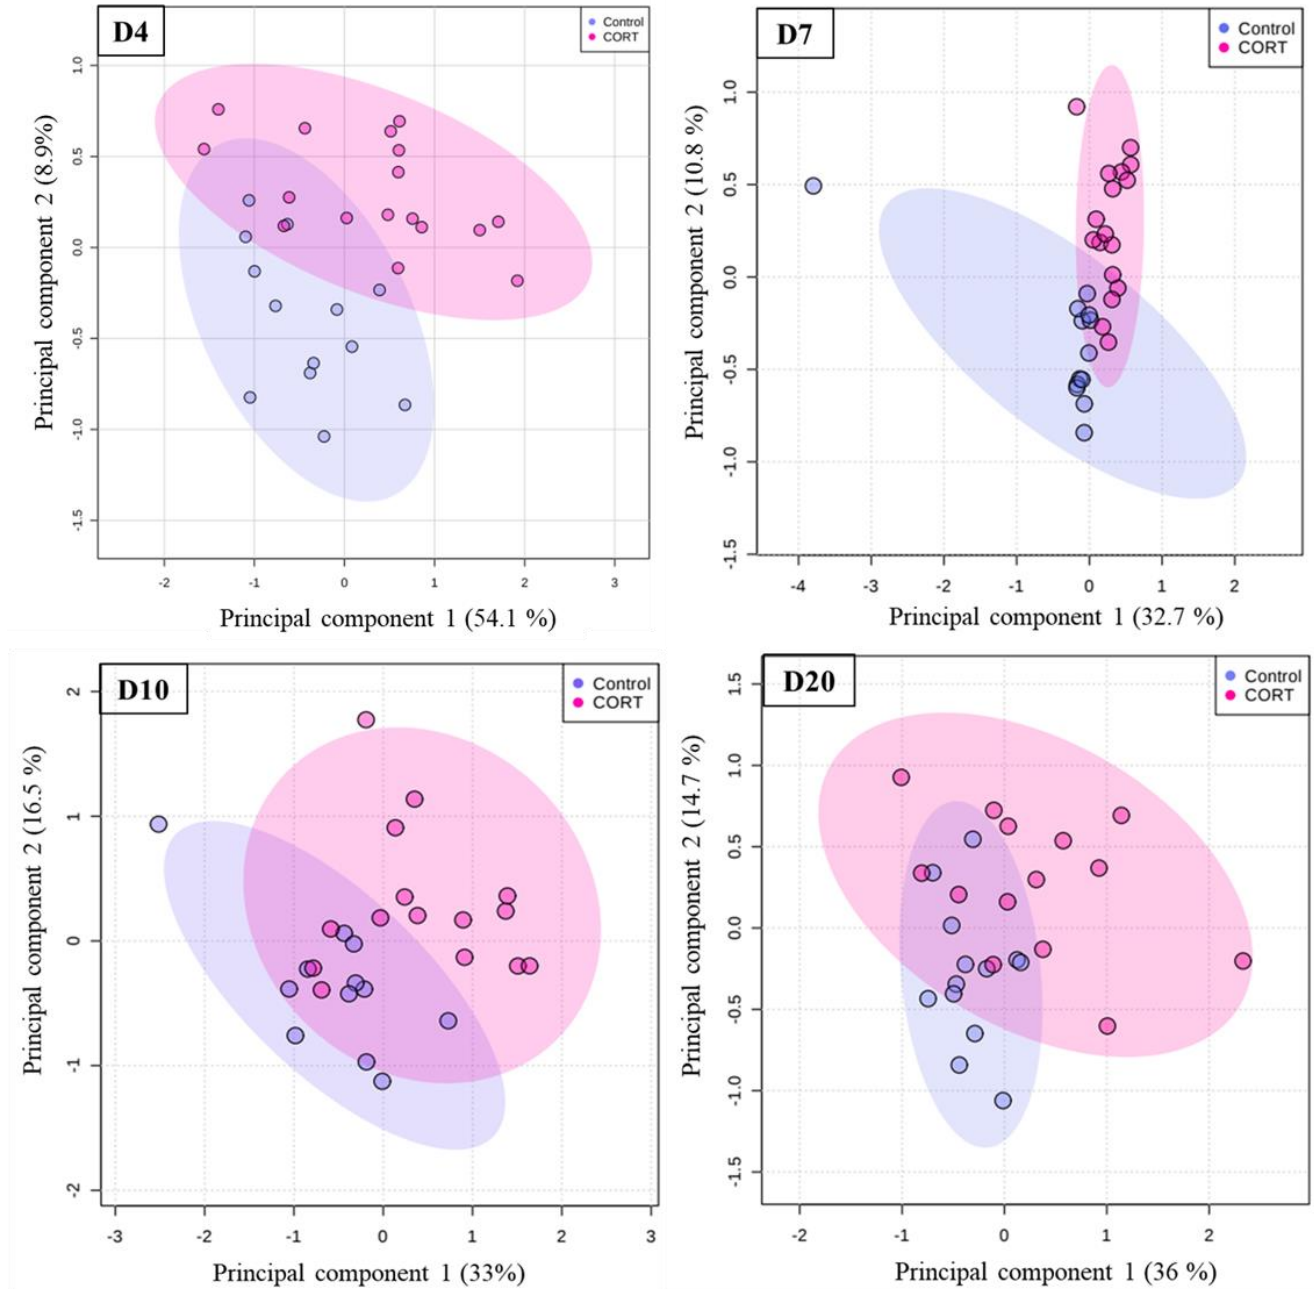

**Figure S1.** Partial least squares discriminant analysis (PLS-DA) scores plots for D4, D7, D10 and D20 for component 1 for serum of lesser scaup (*Aythya affinis*) that received either a CORT pellet (CORT) or a placebo (control). Numbers in parenthesis in axes of the PLS-DA score plot indicate the percentage of the variance explained by a corresponding component. For D4, D7, D10 and D20, PLS-DA models were not significant (10-fold CV values  $< 0.6$  and permutation test  $p > 0.05$ ).
